# Supplementary material for: Cognitive function in early HIV infection
Source: Springer Nature journal article supplement (doi:10.1007/s13365-016-0498-4), 2016-11-28
Supplement: MOESM1 [file 11099318]

| HIV  Controls |
| --- |
| Supplemental Figure 1. Psychomotor speed: HIV subjects showed some improvement, however, performance remained weaker than controls at both baseline and follow-up. |
